# Supplementary material for: Weight development from childhood to motherhood—embodied experiences in women with pre-pregnancy obesity: a qualitative study
Source: Springer Nature journal article supplement (doi:10.1186/s12978-024-01742-z), 2024-01-30
Supplement: MOESM3 [file 26677862]

**Questionnaire S3.** Weight development from childhood to motherhood: Embodied experiences in women with pre-pregnancy obesity- a qualitative study

**Date:**

**First name:**

**Age:**

**Place of residence:** Rural  Semi-urban  Urban

**Marital status:** Married  Cohabiting  Single

**Highest completed level of education:** Primary/lower secondary  Upper secondary   
Vocational qualification  Higher education

**Work/job:**

**Full- or part-time (when not on maternity leave):**

Full-time  Part-time  Other

**Weight at start of pregnancy:**

**Who gave you pregnancy check-ups?** Midwife  Your doctor  Combination

**Height:**

**Number of children:**

**Delivery method:** Normal delivery  Vacuum/forceps  Planned cesarean  Unplanned cesarean

Emergency cesarean

**How many weeks pregnant were you at delivery?**

**Feeding:** Breast-feeding: Yes  No  Number of months of breast-feeding \_\_\_\_\_ Bottle-feeding: Yes  No

Combination of breast- and bottle-feeding

**Please add any comments here:**
